# Supplementary material for: Polyphenolic Characterization of Grape Skins and Seeds of Four Italian Red Cultivars at Harvest and after Fermentative Maceration
Source: Foods. 2019 Sep 6;8(9):395. doi: 10.3390/foods8090395 (PMC6770923; doi:10.3390/foods8090395)
Supplement: Supplementary file 1 [file foods-08-00395-s001.pdf]

**Table S1:** Average berry weight, average skin weight per berry before and after oven drying, and average freeze-drying yields of the skins (expressed as freeze-dried mass/fresh mass) with indices of data variability (standard deviation and CV%).

|                                         | Albarossa | Barbera   | Nebbiolo  | Uvalino   |
|-----------------------------------------|-----------|-----------|-----------|-----------|
| Average berry weight (g)                | 1.04      | 2.88      | 1.75      | 1.27      |
| Average skin weight/ berry (g)          | 0.37      | 0.74      | 0.37      | 0.48      |
| Average oven dry skin weight/ berry (g) | 0.11      | 0.21      | 0.10      | 0.11      |
| Freeze-drying yield (mean±s.d.)         | 0.30±0.06 | 0.32±0.15 | 0.29±0.04 | 0.26±0.07 |
| Freeze-drying yield (CV%)               | 1.73      | 4.74      | 1.17      | 1.93      |

**Table S2:** Correlation matrix between the main variables of the polyphenolic and anthocyanin composition and the ABTS parameter, determined for the grapes skins extracts of Albarossa, Barbera, Nebbiolo and Uvalino cultivars.

|                              | Total anthocyanins | Monomer anthocyanins | Total flavonoids | Flavans react. with vanillin | Proanthocyanidins | Total polyphenols as GAE | mDP   | Condensed tannins | ABTS |
|------------------------------|--------------------|----------------------|------------------|------------------------------|-------------------|--------------------------|-------|-------------------|------|
| Total anthocyanins           | 1                  |                      |                  |                              |                   |                          |       |                   |      |
| Monomer anthocyanins         | 0.978              | 1                    |                  |                              |                   |                          |       |                   |      |
| Total flavonoids             | 0.747              | 0.708                | 1                |                              |                   |                          |       |                   |      |
| Flavans react. with vanillin | -0.825             | -0.804               | -0.266           | 1                            |                   |                          |       |                   |      |
| Proanthocyanidins            | -0.752             | -0.746               | -0.161           | 0.974                        | 1                 |                          |       |                   |      |
| Total polyphenols as GAE     | 0.140              | 0.137                | 0.644            | 0.383                        | 0.509             | 1                        |       |                   |      |
| mDP                          | -0.950             | -0.935               | -0.542           | 0.929                        | 0.849             | 0.034                    | 1     |                   |      |
| Condensed tannins            | -0.781             | -0.782               | -0.178           | 0.962                        | 0.959             | 0.396                    | 0.894 | 1                 |      |
| ABTS                         | -0.554             | -0.577               | 0.017            | 0.748                        | 0.742             | 0.391                    | 0.696 | 0.866             | 1    |

**Table S3:** Correlation matrix between the main variables of the polyphenolic composition and the ABTS parameter, determined for the grape seeds extracts of Albarossa, Barbera, Nebbiolo and Uvalino cultivars.

|                              | Total flavonoids | Flavans react. with vanillin | Proanthocyanidins | Total polyphenols as GAE | mDP   | Condensed tannins | ABTS |
|------------------------------|------------------|------------------------------|-------------------|--------------------------|-------|-------------------|------|
| Total flavonoids             | 1                |                              |                   |                          |       |                   |      |
| Flavans react. with vanillin | 0.951            | 1                            |                   |                          |       |                   |      |
| Proanthocyanidins            | 0.827            | 0.954                        | 1                 |                          |       |                   |      |
| Total polyphenols as GAE     | 0.984            | 0.988                        | 0.908             | 1                        |       |                   |      |
| mDP                          | -0.114           | 0.151                        | 0.428             | 0.028                    | 1     |                   |      |
| Condensed tannins            | 0.878            | 0.948                        | 0.938             | 0.30                     | 0.222 | 1                 |      |
| ABTS                         | 0.879            | 0.949                        | 0.913             | 0.940                    | 0.123 | 0.895             | 1    |
